# Supplementary material for: High-Performance Photodetectors Based on MoTe2–MoS2 van der Waals Heterostructures
Source: PubMed Central journal article supplement — ACS Omega. 2022 Mar 15;7(12):10049–55. doi: 10.1021/acsomega.1c06009 (PMC8973031; doi:10.1021/acsomega.1c06009), 2022-03-15
Supplement: ao1c06009_si_001.pdf [file ao1c06009_si_001.pdf]

## Supporting Information for

# High-Performance Photodetectors Based on MoTe<sub>2</sub>-MoS<sub>2</sub> van der Waals Heterostructures

Xuan Ji<sup>1</sup>, Zongqi Bai<sup>1</sup>, Fang Luo<sup>1</sup>, Mengjian Zhu<sup>1,\*</sup>, Chucai Guo<sup>1,\*</sup>, Zhihong Zhu<sup>1</sup>, Shiqiao

Qin<sup>1</sup>

<sup>1</sup> College of Advanced Interdisciplinary Studies & Hunan Provincial Key Laboratory of Novel Nano-Optoelectronic Information Materials and Devices, National University of Defense Technology, Changsha, Hunan, 410073, P.R. China.

\* Corresponding to:

M. Zhu ([zhumengjian11@nudt.edu.cn](mailto:zhumengjian11@nudt.edu.cn)) and C. Guo ([gcc\\_1981@163.com](mailto:gcc_1981@163.com))

**Figure S1.** AFM morphology image of the MoTe<sub>2</sub>-MoS<sub>2</sub> heterostructure.

**Figure S2.** The characterizations of the MoTe<sub>2</sub>-MoS<sub>2</sub> heterostructures device.

**Figure S3.** The  $I$ - $V$  curve of the MoTe<sub>2</sub>-MoS<sub>2</sub> heterostructures device before annealing.

**Figure S4.** Spatial distribution of the photocurrent.

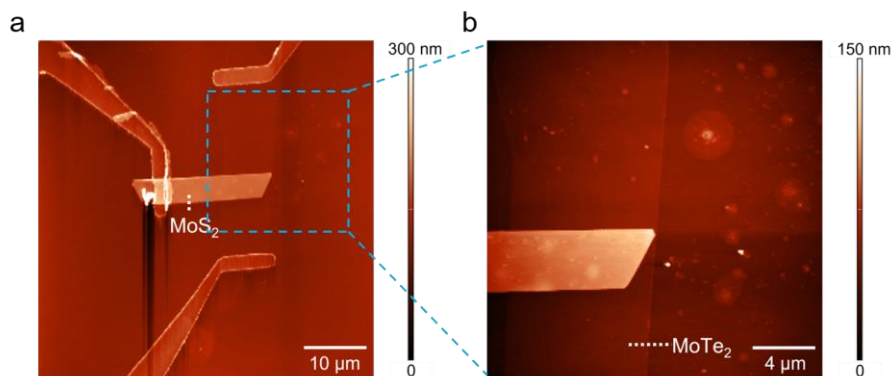

**Figure S1.** AFM morphology image of the MoTe<sub>2</sub>-MoS<sub>2</sub> heterostructure device in Figure 1c in the main text. (a) The AFM height image of device showing the height of MoS<sub>2</sub>. (b) The magnified AFM height image of device showing the height of MoTe<sub>2</sub>. The white dashed lines correspond to the height measurement of MoTe<sub>2</sub> and MoS<sub>2</sub>, respectively.

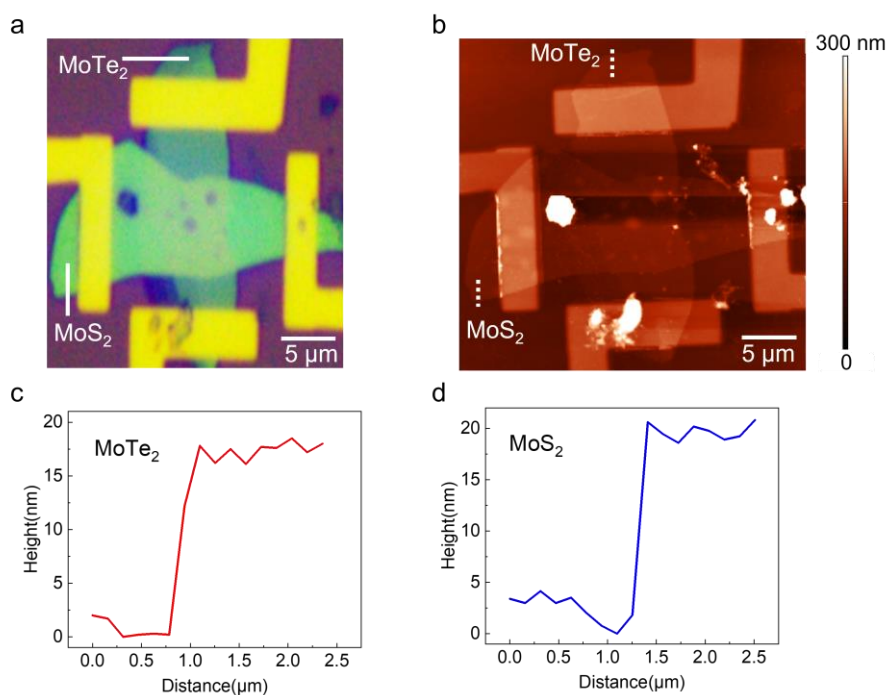

**Figure S2.** The characterizations of the MoTe<sub>2</sub>-MoS<sub>2</sub> heterostructures device. (a) The optical microscopy image of the device in Figure 1g-h and Figure 2e in the maintext. (b) The AFM height image of the device, and the white dashed line corresponds to the

height measurement of MoTe<sub>2</sub> and MoS<sub>2</sub>, respectively. (c) The height profile of MoTe<sub>2</sub>, and the thickness of MoTe<sub>2</sub> is about 16.7 nm. (d) The height profile of MoS<sub>2</sub>, and the thickness of MoS<sub>2</sub> is about 17.3 nm.

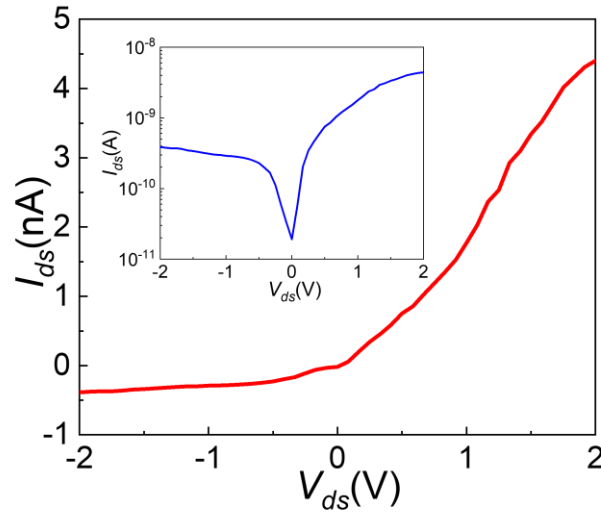

**Figure S3.** The  $I$ - $V$  curve of the non-annealed MoTe<sub>2</sub>-MoS<sub>2</sub> heterostructures device.

The inset picture shows the  $I$ - $V$  characteristics in logarithmic coordinate.

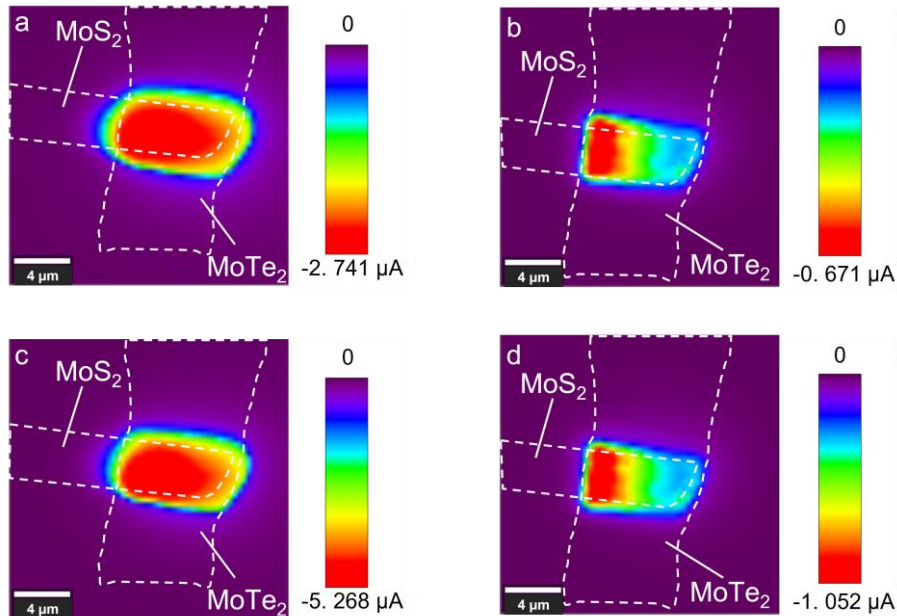

**Figure S4.** Spatial distribution of the photocurrent. (a)  $\lambda = 532$  nm,  $V_{ds} = -1$  V. (b)  $\lambda = 1064$  nm,  $V_{ds} = -1$  V. (c)  $\lambda = 532$  nm,  $V_{ds} = -2$  V. (d)  $\lambda = 1064$  nm,  $V_{ds} = -2$  V.
